# Supplementary material
Source: PubMed Central journal article supplement (PMC3738235)
Supplement: jn.112.172460_nutrition172460SupplementaryData.pdf [file jn.112.172460_nutrition172460SupplementaryData.pdf]

## Online Supporting Material

**Supplemental Table1** Experimental diets<sup>1</sup>

| Ingredient                           | LF diet, g/kg | HF diet, g/kg |
|--------------------------------------|---------------|---------------|
| Casein                               | 189.6         | 233.1         |
| L-Cystine                            | 2.8           | 3.5           |
| Corn Starch                          | 298.6         | 84.8          |
| MaltoDextrin                         | 33.2          | 116.5         |
| Sucrose                              | 331.8         | 201.4         |
| Cellulose                            | 47.4          | 58.3          |
| Soybean Oil                          | 23.7          | 29.1          |
| Lard                                 | 19.0          | 206.9         |
| Trace Element Mix <sup>2</sup>       | 9.5           | 11.7          |
| Dicalcium phosphate                  | 12.3          | 15.2          |
| Calcium Carbonate                    | 5.2           | 6.4           |
| Potassium Citrate, 1H <sub>2</sub> O | 15.6          | 19.2          |
| Vitamin Mix AIN76A <sup>3</sup>      | 9.5           | 11.7          |
| Choline Bitartrate                   | 1.9           | 2.3           |
| Total                                | 1000          | 1000          |
|                                      |               |               |
| <u>Calculated content</u>            |               |               |
| Total energy, kcal/kg                | 3700          | 4600          |
| Total fat, g/kg                      | 43            | 235           |
| Fat calories, %                      | 10            | 45            |
| n6:n3 fatty acid ratio               | 8             | 13            |

<sup>1</sup> Research Diets, Inc., New Brunswick, NJ.

<sup>2</sup> Amounts per 10 g of premix: 0.5 g Mg, 0.3 g S, 1.0 g Na, 1.6 g Cl, 6.0 mg Cu, 0.2 mg I, 45.0 mg Fe, 59mg Mn, 0.2 mg Se and 29 mg Zn.

<sup>3</sup> Amount per 10 g of premix:: 4000 IU vitamin A palmitate, 1000 IU cholecalciferol, 50 IU vitamin E acetate, 0.5 mg menadione sodium bisulfate, 0.2 mg biotin, 10 mg cyanocobalamin, 2 mg folic acid, 30 mg nicotinic acid, 16 mg calcium pantothenate, 7 mg pyridoxine-HCL, 6 mg riboflavin, 6 mg thiamin HCl.
